# Supplementary material
Source: Springer Nature journal article supplement (https://www.springermedizin.de/resource/supplementary/13054_2013_2510_MOESM4_ESM.pdf/9714180)
Supplement: MOESM4 [file 9714180]

Vancomycin trough concentration ( $C_{min}$ ), mg/L

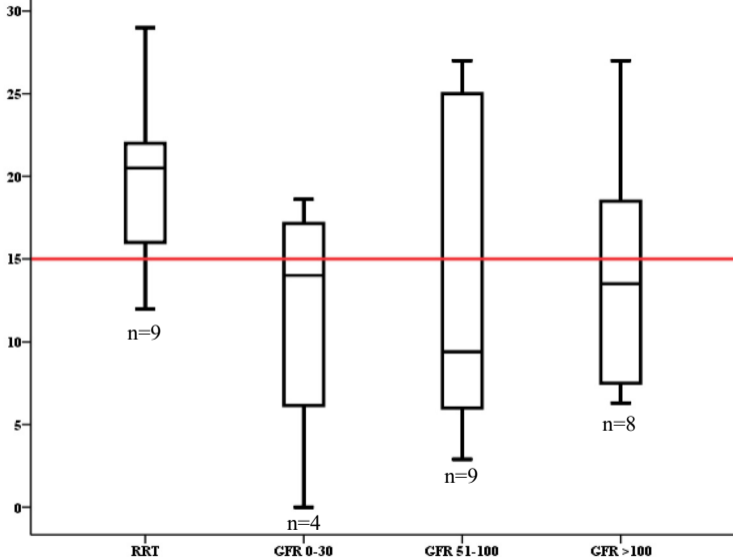

Renal replacement therapy (RRT) or glomerular filtration rate (GFR), mL/min.
